# Supplementary material
Source: PubMed Central journal article supplement (PMC6464127)
Supplement: NIHMS1010126-supplement-Suppl.pdf [file NIHMS1010126-supplement-Suppl.pdf]

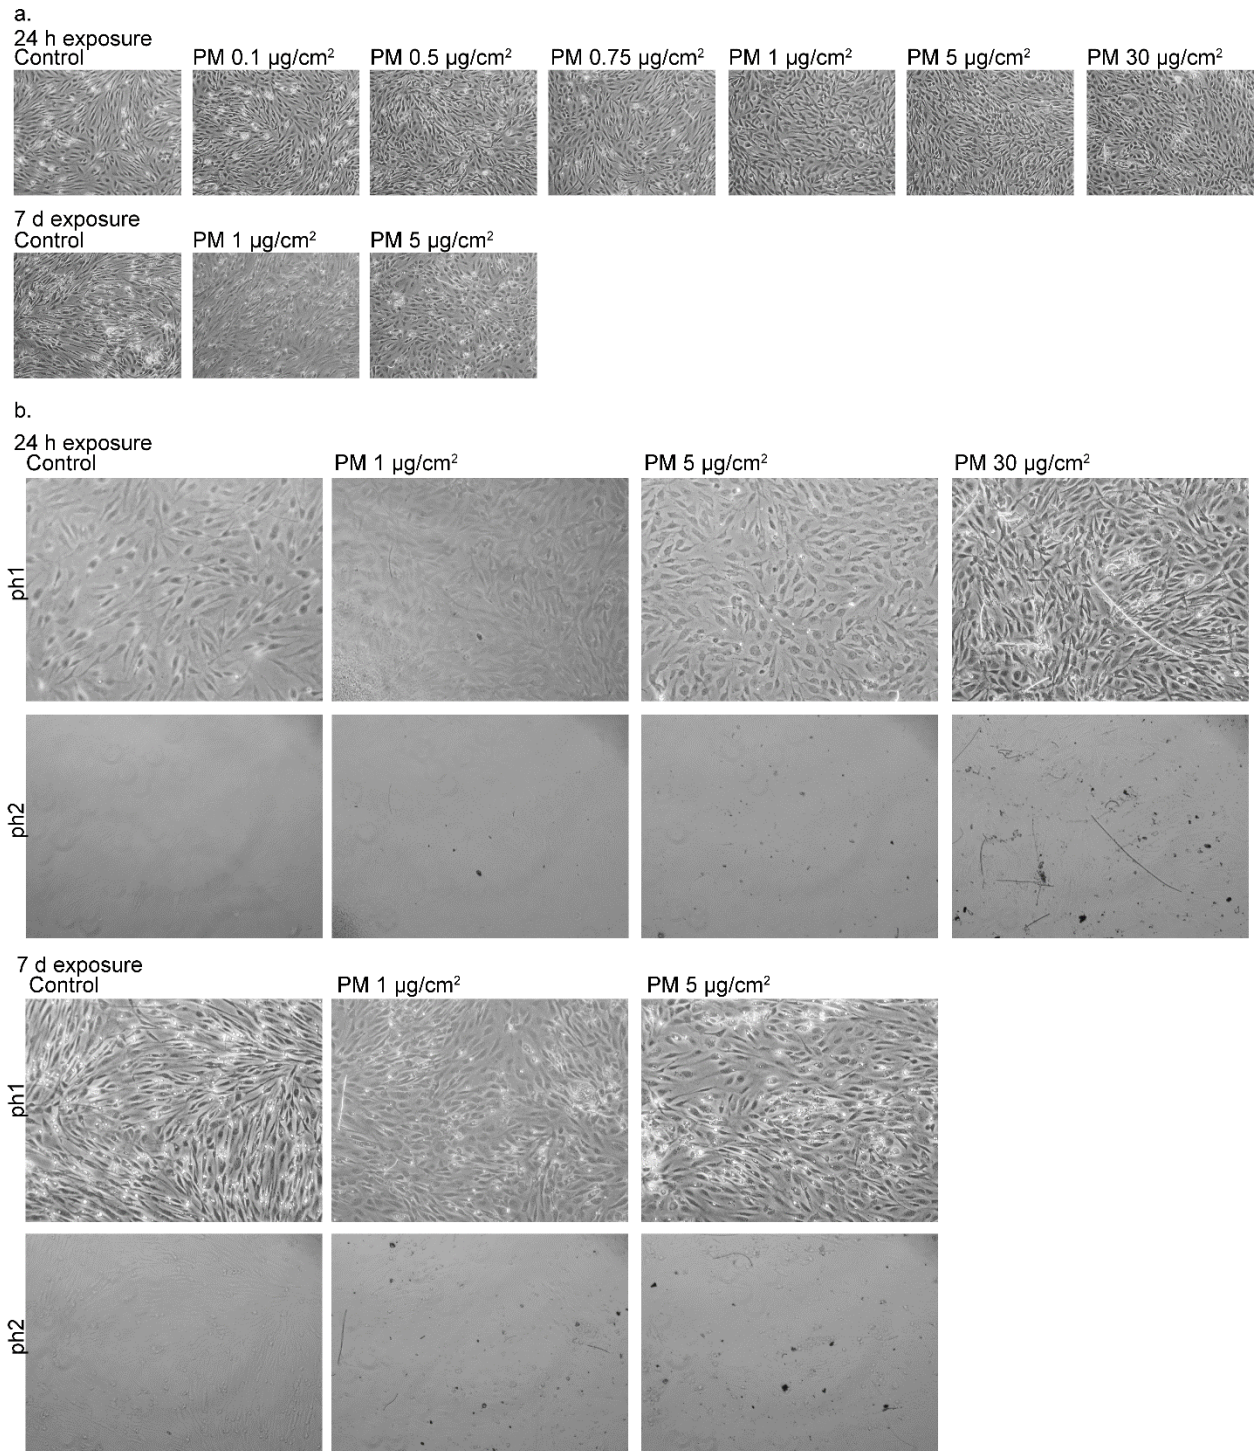

Supplemental Fig. 1. a) Representative images taken by bright-field microscopy at  $\times 100$  magnification of cells treated with  $\text{PM}_{2.5}$  at the indicated concentrations. Included are images from experiments of cells treated for 24 h (h) and cells treated each day for seven days (d). b) Representative images by bright-field microscopy at  $\times 200$  magnification using two different phase-contrast filters (ph 1 and ph 2) to demonstrate the distribution of PM among the cells treated at the indicated concentrations and duration.

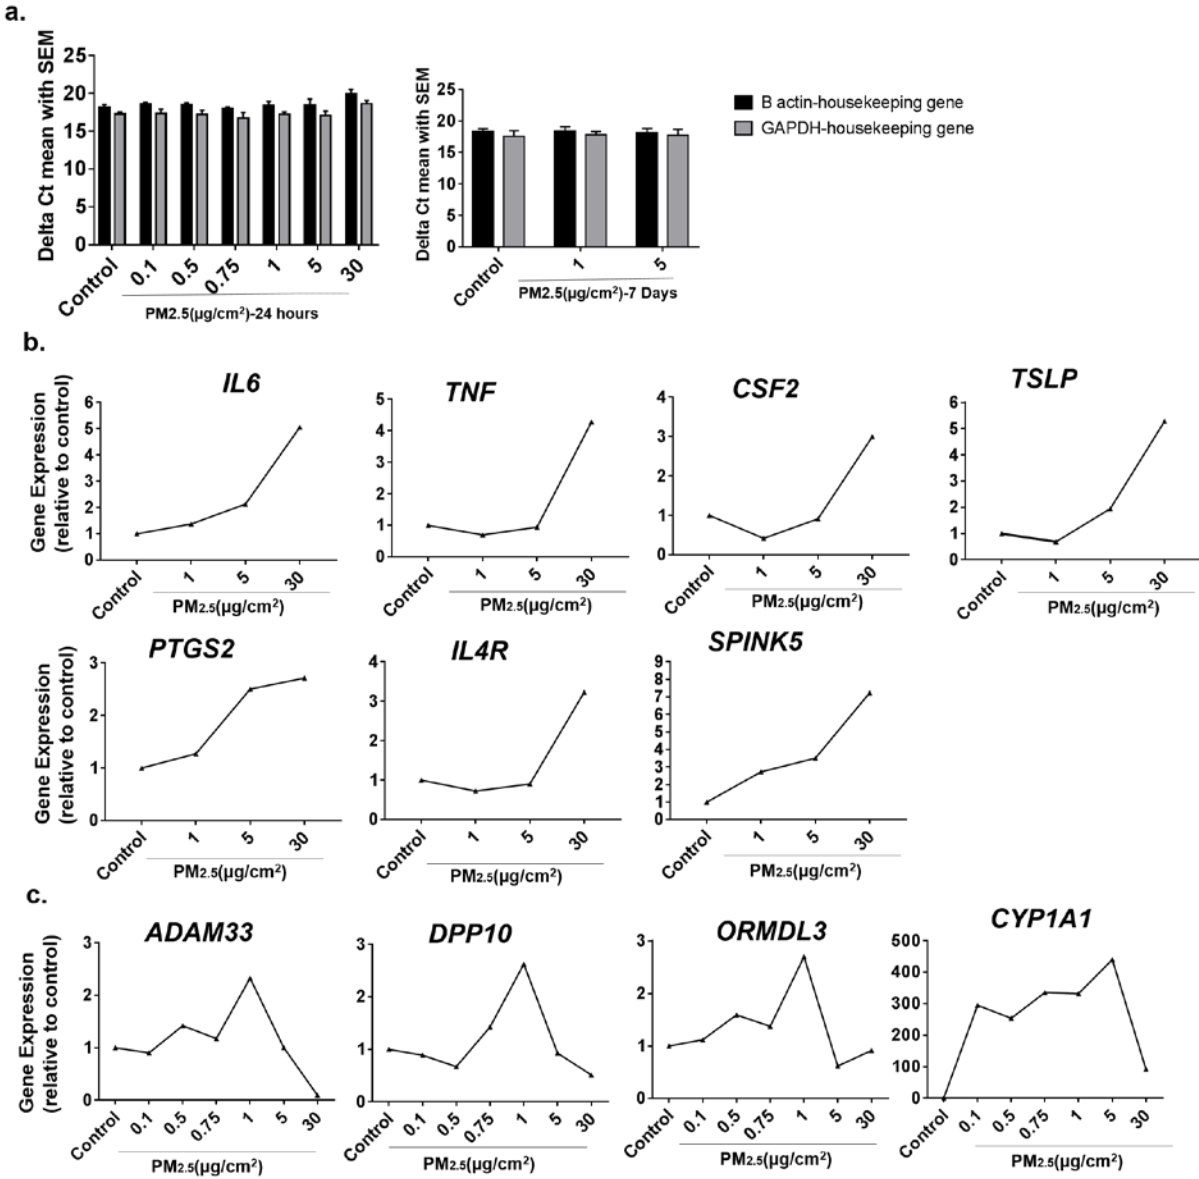

Supplemental Fig. 2. Expression of genes relative to GAPDH as an alternative endogenous control a) Relative  $C_t$  values by RT-PCR for  $\beta$ -actin and GAPDH from cells treated with different concentrations of  $PM_{2.5}$  for the indicated durations. b) Expression of different genes by RT-PCR when compared relative to GAPDH as endogenous control. N = 3 independent experiments.
